# Supplementary material for: Flux synthesis of single crystal bismuth vanadate (BiVO4) nanowires and their visible light driven photocatalytic water oxidation properties
Source: Royal Society of Chemistry journal article supplement (doi:10.1039/d4ta08318k), 2025-01-01
Supplement: d4ta08318k1.pdf [file d4ta08318k1.pdf]

## Supporting Information

### Flux Synthesis of Single Crystal Bismuth Vanadate ( $\text{BiVO}_4$ ) Nanowires and their Visible Light Driven Photocatalytic Water Oxidation Properties

Chengcan Xiao,<sup>a</sup> Samutr Assavachin,<sup>a</sup> William Hahn,<sup>b</sup> Li Wang,<sup>a</sup> Klaus van Benthem,<sup>b</sup> Frank E.  
Osterloh<sup>a,\*</sup>

<sup>a</sup> Department of Chemistry, University of California, Davis, California 95616, United States;

<https://orcid.org/0000-0002-9288-3407>; Email: [fosterloh@ucdavis.edu](mailto:fosterloh@ucdavis.edu)

<sup>b</sup> Department of Materials Science and Engineering, University of California, Davis, California 95616,  
United States

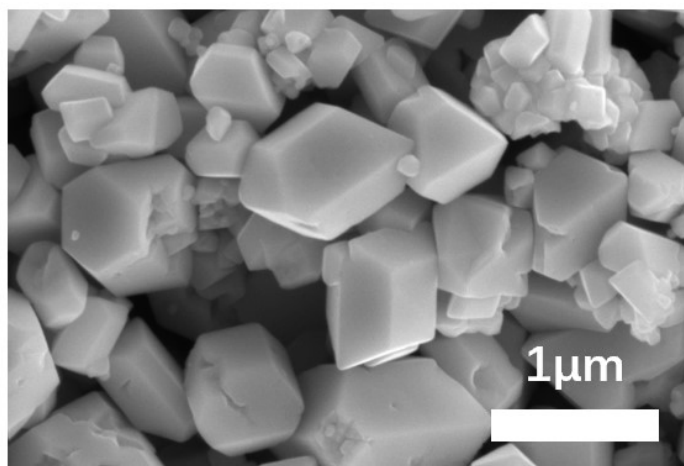

**Figure S1.** SEM image of the  $\text{BiVO}_4$  ( $\text{BiVO}_4$ ) microparticles used as the precursor for flux synthesis of  $\text{BiVO}_4$  NWs.

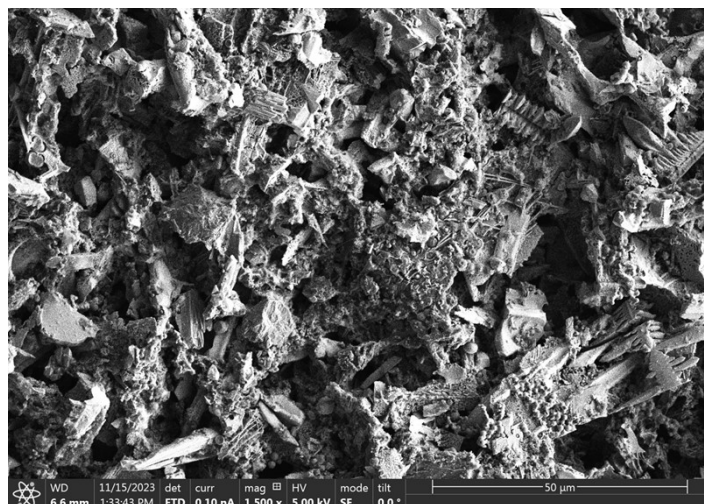

**Figure S2.** SEM of the  $\text{BiVO}_4$  product from a flux synthesis using 1:20  $\text{BiVO}_4$ -to- $\text{NaVO}_3$  ratio. The other conditions of the flux synthesis were the same as Figure 1 shows.

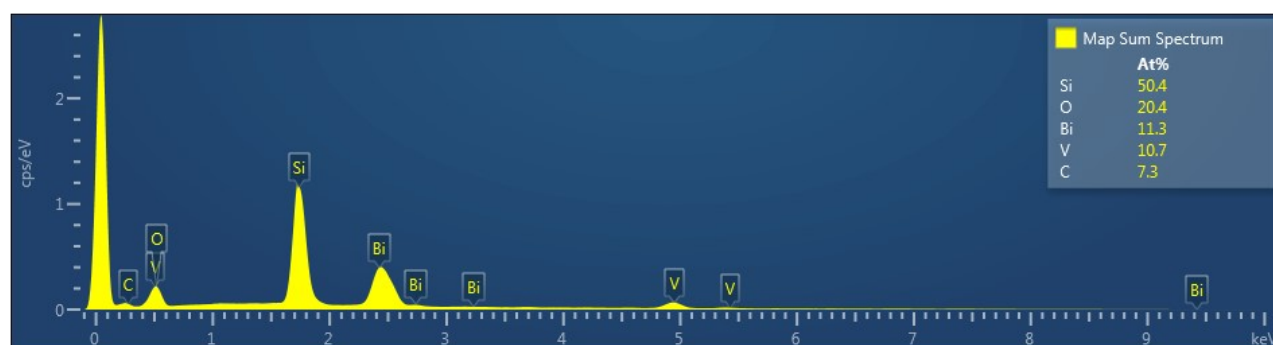

**Figure S3.** EDX spectrum of the respective  $\text{BiVO}_4$  NW sample. The Si and C signals were respectively from the Si substrate and residue of ethanol solvent used during sample preparation for drop-coating a suspension of  $\text{BiVO}_4$  NWs.

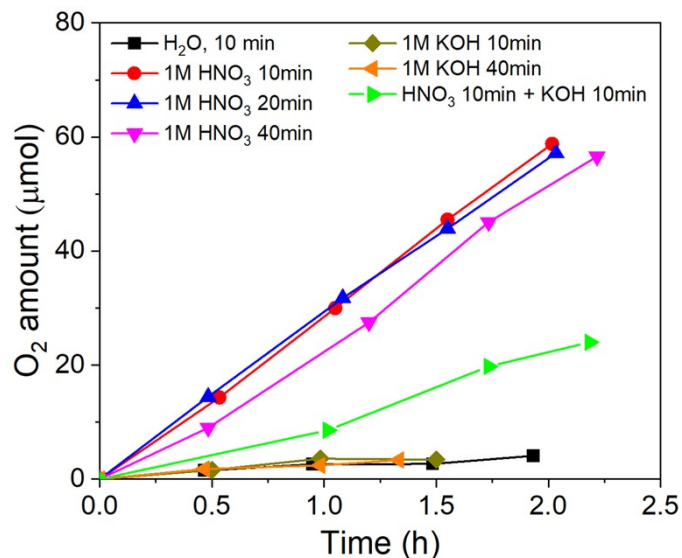

**Figure S4.** Visible-light-driven O<sub>2</sub> evolution of 100 mg BiVO<sub>4</sub> NWs in 100 mL 0.02 M Fe(NO<sub>3</sub>)<sub>3</sub> solution. The BiVO<sub>4</sub> NWs samples used here are either after 10 min, 20 min, 40 min of 1 M HNO<sub>3</sub> wash (red, blue, purple curve, respectively), 10 min, 40 min of 1 M KOH wash (dark yellow, orange curves, respectively), 10 min of 1 M HNO<sub>3</sub> wash followed by 10 min of 1 M KOH wash (green curve), or 10 min H<sub>2</sub>O wash (black curve). The gas evolution reaction was done under the illumination of a 100 W Xe lamp with a 0.22 M NaNO<sub>2</sub> chemical long-pass filter to cut off the UV light, and the visible light intensity was 390 mW/cm<sup>2</sup> measured by a GaAsP detector (International Light NIST traceable photometer).

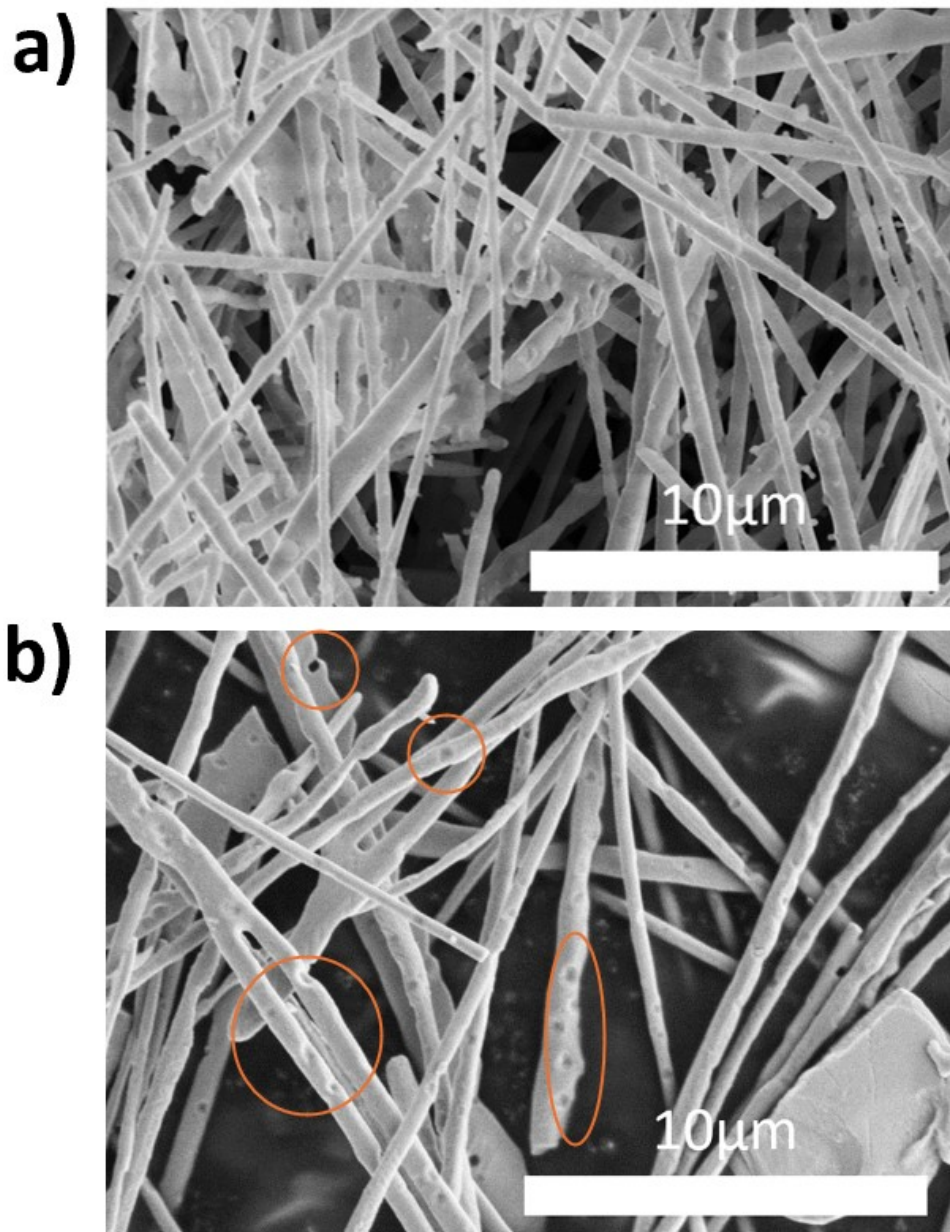

**Figure S5.** SEM images of BiVO<sub>4</sub> NWs (a) before and (b) after 5 min soaking in 1.0 M HNO<sub>3</sub>. Surface pits were observed as marked in orange circles.

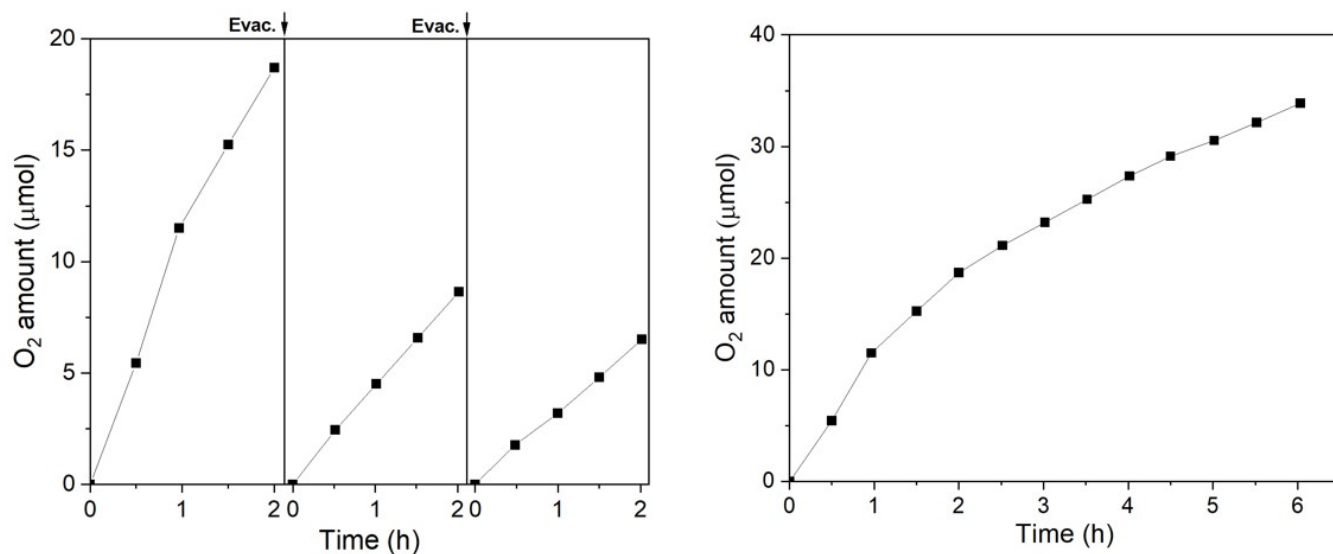

**Figure S6. (Left)** 6-hour continuous O<sub>2</sub> evolution test of BiVO<sub>4</sub> NWs in 100 mL of 0.02 M Fe(NO<sub>3</sub>)<sub>3</sub> under visible Xe illumination at  $\sim 350 \text{ mW/cm}^2$  ( $\lambda > 400 \text{ nm}$ ). The BiVO<sub>4</sub> NWs were etched for 5 min in 1.0 M HNO<sub>3</sub> prior to the experiment and the flask was evacuated after every 2 hours. **(Right)** Cumulative amount of evolved oxygen (data from plot on the left).

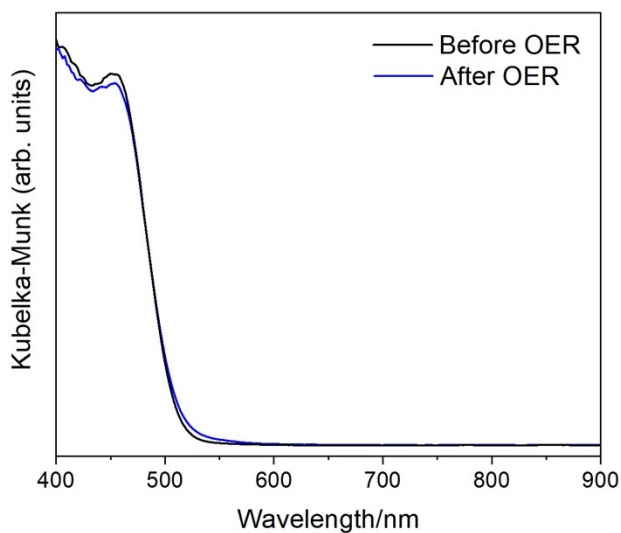

**Figure S7.** UV-Vis spectra of BiVO<sub>4</sub> NWs before and after the 6 h photocatalytic oxygen evolution reaction (OER).

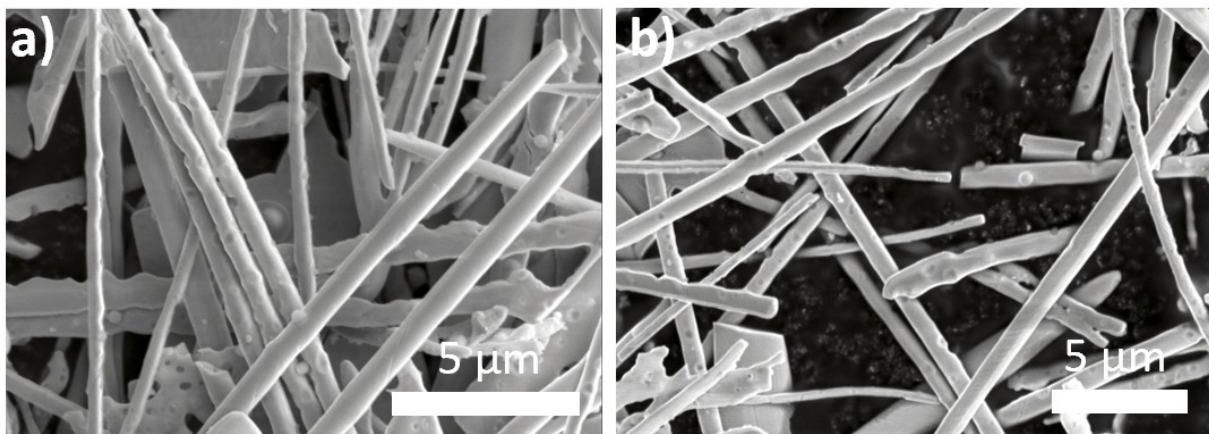

**Figure S8.** SEM images of  $\text{BiVO}_4$  NWs (a) before and (b) after the OER experiment. The  $\text{BiVO}_4$  NWs here were etched for 5 min in 1.0 M  $\text{HNO}_3$  prior to the illumination experiment.

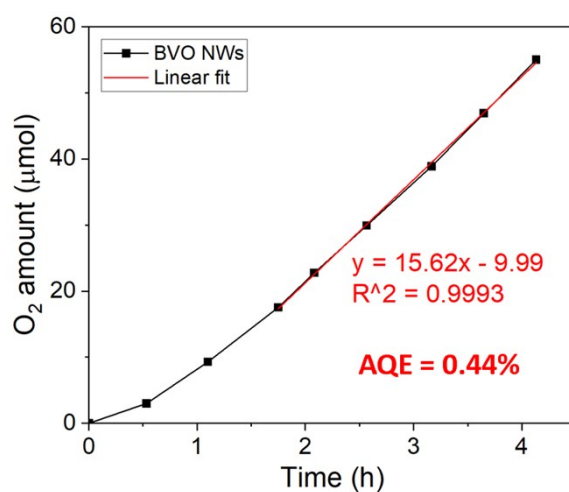

**Figure S9.**  $\text{O}_2$  evolution of the  $\text{BiVO}_4$  NWs in 0.02 M  $\text{Fe}(\text{NO}_3)_3$  under illumination from a 405 nm LED (622  $\text{mW}/\text{cm}^2$ ), as measured with a GaAsP photodetector (International Light). The area of illumination was 1.90  $\text{cm}^2$ . The  $\text{O}_2$  rate was obtained from the linear region of the curve.



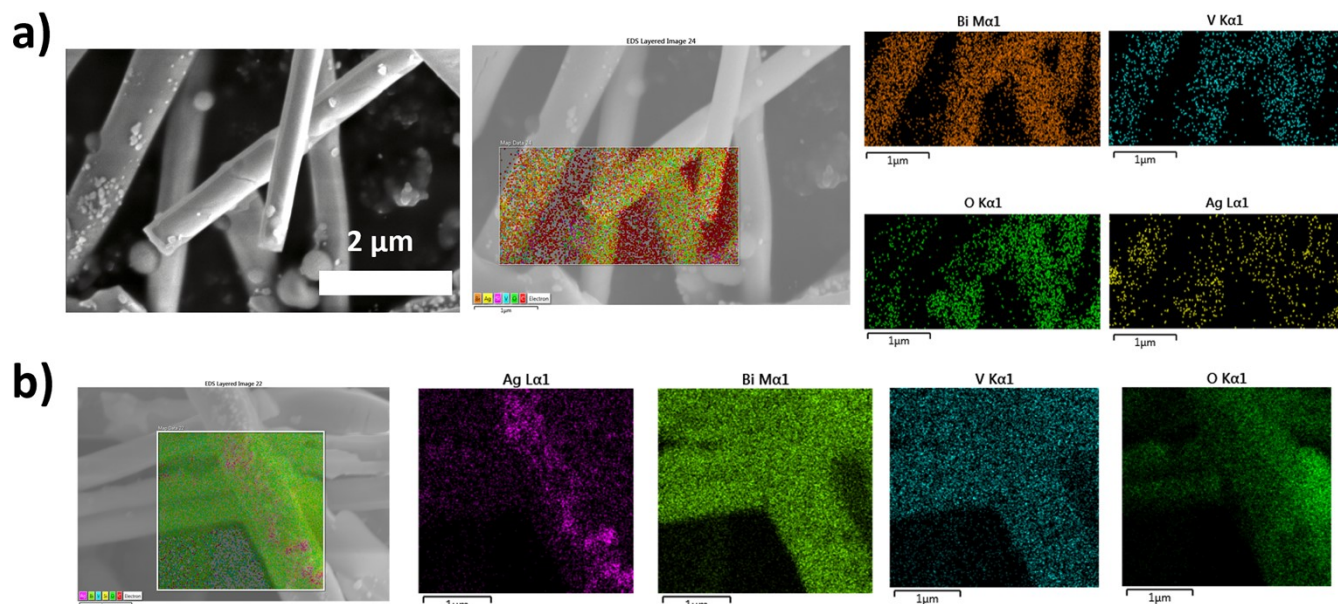

**Figure S10.** EDX elemental mapping at the (a) nanowire tip and (b) lateral surface of  $\text{BiVO}_4$  NWs after photodeposition of Ag. Ag was found to cover the lateral surface mainly, rather than the NW ends.

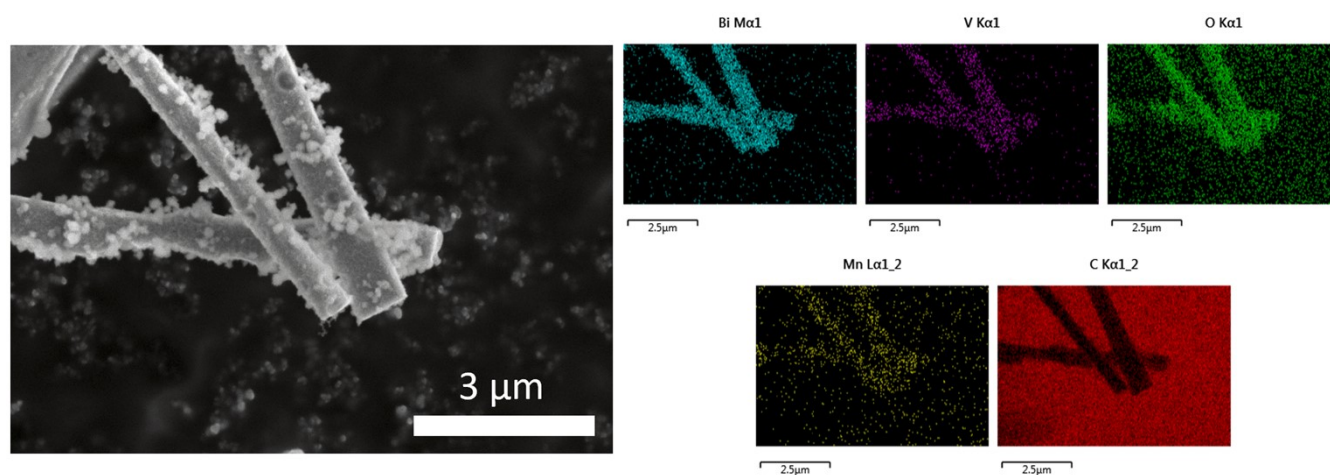

**Figure S11.** SEM and EDX elemental mapping of the  $\text{BiVO}_4$  nanowire after 2 h photodeposition of  $\text{MnO}_x$ .

**Table S1.** Apparent quantum efficiency (AQE), photocatalytic oxygen evolution and the corresponding experimental parameters of BiVO<sub>4</sub> NWs and other reported BiVO<sub>4</sub> photocatalysts.

| Photocatalyst                                | e <sup>-</sup> acceptor                                        | Light source              | Light intensity/mW·cm <sup>-2</sup> | O <sub>2</sub> evolution rate              | AQE/% | Reference # |
|----------------------------------------------|----------------------------------------------------------------|---------------------------|-------------------------------------|--------------------------------------------|-------|-------------|
| BiVO <sub>4</sub> NWs                        | Fe <sup>3+</sup>                                               | 300 W Xe lamp + UV filter | ~550 mW/cm <sup>2</sup>             | 28.75 μmol·h <sup>-1</sup>                 | 0.44  | This work   |
| BiVO <sub>4</sub> nanowires                  | Fe <sup>3+</sup>                                               | 300 W Xe lamp + UV filter | N/A                                 | 0.19 μmol·h <sup>-1</sup>                  | N/A   | 1           |
| Well-defined BiVO <sub>4</sub> crystals      | Fe <sup>3+</sup>                                               | 300 W Xe lamp + UV filter | -                                   | ~150 μmol·h <sup>-1</sup>                  | 71    | 2           |
| Ir-FeCoO <sub>x</sub> /BiVO <sub>4</sub>     | [Fe(CN) <sub>6</sub> ] <sup>3-</sup> and HEP                   | 300 W Xe lamp + UV filter | -                                   | 80 μmol·h <sup>-1</sup>                    | 12.3  | 3           |
| BiVO <sub>4</sub> -100                       | Ag <sup>+</sup>                                                | 300 W Xe lamp + UV filter | -                                   | 4476 μmol·h <sup>-1</sup> ·m <sup>-2</sup> | 9.3   | 4           |
| BiVO <sub>4</sub> -100                       | Fe <sup>3+</sup>                                               | 300 W Xe lamp + UV filter | -                                   | 1750 μmol·h <sup>-1</sup> ·m <sup>-2</sup> | 4.5   | 4           |
| BiVO <sub>4</sub> fine particles             | Fe <sup>3+</sup>                                               | 300 W Xe lamp + UV filter | -                                   | ~90 μmol·h <sup>-1</sup>                   | 1.2   | 5           |
| F/Ce-codoped BiVO <sub>4</sub>               | Ag <sup>+</sup>                                                | 250 W Hg lamp + UV filter | -                                   | 17.5 μmol·h <sup>-1</sup>                  | -     | 6           |
| Ni@NiO-loaded W:BiVO <sub>4</sub> nanofibers | Ag <sup>+</sup>                                                | 450 W Xe lamp + UV filter | -                                   | 0.075 μmol·h <sup>-1</sup>                 | -     | 7           |
| mesoporous undoped BiVO <sub>4</sub> NFs     | Ag <sup>+</sup>                                                | 300 W Xe lamp             | -                                   | 13.7 μmol·h <sup>-1</sup>                  | -     | 8           |
| Mesoporous Cu:BVO nanotubes/CoO <sub>x</sub> | Na <sub>2</sub> S <sub>2</sub> O <sub>8</sub> /OH <sup>-</sup> | 300 W Xe lamp + UV filter | -                                   | 7.004 μmol·h <sup>-1</sup>                 | 2.63  | 9           |
| 24-faceted concave BiVO <sub>4</sub>         | Ag <sup>+</sup>                                                | 300 W Xe lamp + UV filter | -                                   | 178.8 μmol·h <sup>-1</sup>                 | 30.7  | 10          |



## References

- (1) Liu, B.; Wu, C.-H.; Miao, J.; Yang, P. All Inorganic Semiconductor Nanowire Mesh for Direct Solar Water Splitting. *ACS Nano* **2014**, *8* (11), 11739-11744. DOI: 10.1021/nm5051954.
- (2) Zhao, Y.; Ding, C.; Zhu, J.; Qin, W.; Tao, X.; Fan, F.; Li, R.; Li, C. A Hydrogen Farm Strategy for Scalable Solar Hydrogen Production with Particulate Photocatalysts. *Angew. Chem. Int. Ed.* **2020**, *59* (24), 9653–9658. <https://doi.org/10.1002/anie.202001438>.
- (3) Qi, Y.; Zhang, J.; Kong, Y.; Zhao, Y.; Chen, S.; Li, D.; Liu, W.; Chen, Y.; Xie, T.; Cui, J.; Li, C.; Domen, K.; Zhang, F. Unraveling of Cocatalysts Photodeposited Selectively on Facets of BiVO<sub>4</sub> to Boost Solar Water Splitting. *Nat. Commun.* **2022**, *13* (1), 484. <https://doi.org/10.1038/s41467-022-28146-6>.
- (4) Deng, Y.; Zhou, H.; Zhao, Y.; Yang, B.; Shi, M.; Tao, X.; Yang, S.; Li, R.; Li, C. Spatial Separation of Photogenerated Charges on Well-Defined Bismuth Vanadate Square Nanocrystals. *Small* **2022**, *18* (5), 2103245. <https://doi.org/10.1002/smll.202103245>.
- (5) Okunaka, S.; Tokudome, H.; Hitomi, Y.; Abe, R. Preparation of Fine Particles of Sheelite-Monoclinic Phase BiVO<sub>4</sub> via an Aqueous Chelating Method for Efficient Photocatalytic Oxygen Evolution under Visible-Light Irradiation. *J. Mater. Chem. A* **2016**, *4* (10), 3926–3932. <https://doi.org/10.1039/C5TA09789D>.
- (6) Abbood, H. A.; Alabdie, A.; Al-Hawash, A.; Abbood, A. A.; Huang, K. Fabrication of Double-Sided Comb-like F/Ce Co-Doped BiVO<sub>4</sub> Micro/Nanostructures for Enhanced Photocatalytic Degradation and Water Oxidation. *J. Nanoparticle Res.* **2020**, *22* (4), 78. <https://doi.org/10.1007/s11051-020-04792-z>.

- (7) Ro Yoon, K.; Wan Ko, J.; Youn, D.-Y.; Beum Park, C.; Kim, I.-D. Synthesis of Ni-Based Co-Catalyst Functionalized W:BiVO<sub>4</sub> Nanofibers for Solar Water Oxidation. *Green Chem.* **2016**, *18* (4), 944–950. <https://doi.org/10.1039/C5GC01588J>.
- (8) Yu, M.; Shang, C.; Ma, G.; Meng, Q.; Chen, Z.; Jin, M.; Shui, L.; Zhang, Y.; Zhang, Z.; Yuan, M.; Wang, X.; Zhou, G. Synthesis and Characterization of Mesoporous BiVO<sub>4</sub> Nanofibers with Enhanced Photocatalytic Water Oxidation Performance. *Appl. Surf. Sci.* **2019**, *481*, 255–261. <https://doi.org/10.1016/j.apsusc.2019.03.056>.
- (9) He, B.; Li, Z.; Zhao, D.; Liu, H.; Zhong, Y.; Ning, J.; Zhang, Z.; Wang, Y.; Hu, Y. Fabrication of Porous Cu-Doped BiVO<sub>4</sub> Nanotubes as Efficient Oxygen-Evolving Photocatalysts. *ACS Appl. Nano Mater.* **2018**, *1* (6), 2589–2599. <https://doi.org/10.1021/acsanm.8b00281>.
- (10) Hu, J.; He, H.; Li, L.; Zhou, X.; Li, Z.; Shen, Q.; Wu, C.; Asiri, A. M.; Zhou, Y.; Zou, Z. Highly Symmetrical, 24-Faceted, Concave BiVO<sub>4</sub> Polyhedron Bounded by Multiple High-Index Facets for Prominent Photocatalytic O<sub>2</sub> Evolution under Visible Light. *Chem. Commun.* **2019**, *55* (33), 4777–4780. <https://doi.org/10.1039/C9CC01366K>.
